# Supplementary material for: Virtual screening andin vitrovalidation identifies the first reported inhibitors ofSalmonella entericaHPPK
Source: Royal Society of Chemistry journal article supplement (doi:10.1039/d1md00237f), 2021-01-01

## Virtual screening and *in vitro* validation identifies new inhibitors of *Salmonella enterica* HPPK.

### SUPPORTING INFO

#### Energy parameters used for ligand preparation.

---

|                     |                                     |
|---------------------|-------------------------------------|
| <b>Energy</b>       |                                     |
| Force field         | OPLS3e                              |
| Charges             | Charge using OPLS3e partial charges |
| Ionisation          | Neutral                             |
| Chirality           | Retain specific chiralities         |
| <b>Conformation</b> |                                     |
| Conformations       | 250                                 |

---

#### Energy parameters used for the docking molecular mechanics calculations.

---

|                                                   |                                     |
|---------------------------------------------------|-------------------------------------|
| <b>Glide Docking</b>                              |                                     |
| Force field                                       | OPLS3e                              |
| Charges                                           | Charge using OPLS3e partial charges |
| Quality                                           | SP (Standard Precision)             |
| Scaling factor                                    | 0.8                                 |
| Partial charge cut-off                            | 0.15                                |
| Ligand sampling                                   | Flexible                            |
| Distance-dependant dielectric constant            | 2.0                                 |
| Maximum number of minimisation steps              | 100                                 |
| <b>Prime MM-GBSA (Binding energy calculation)</b> |                                     |
| Force field                                       | OPLS3e                              |
| Solvation model                                   | VSGB                                |

---

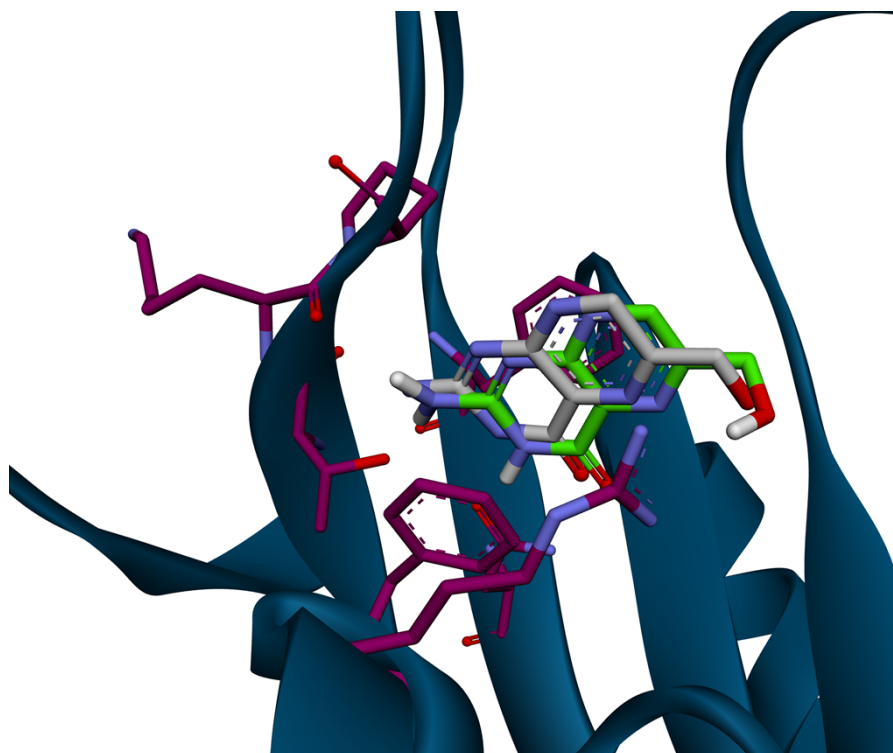

**Figure S1.** Co-crystallised HP (coordinates taken from YpHPPK co-crystal structure PDB ID 2QX0) overlaid with re-docked HP (green), showing that the docking protocol placed the endogenous ligand in the same pocket with a similar binding pose.

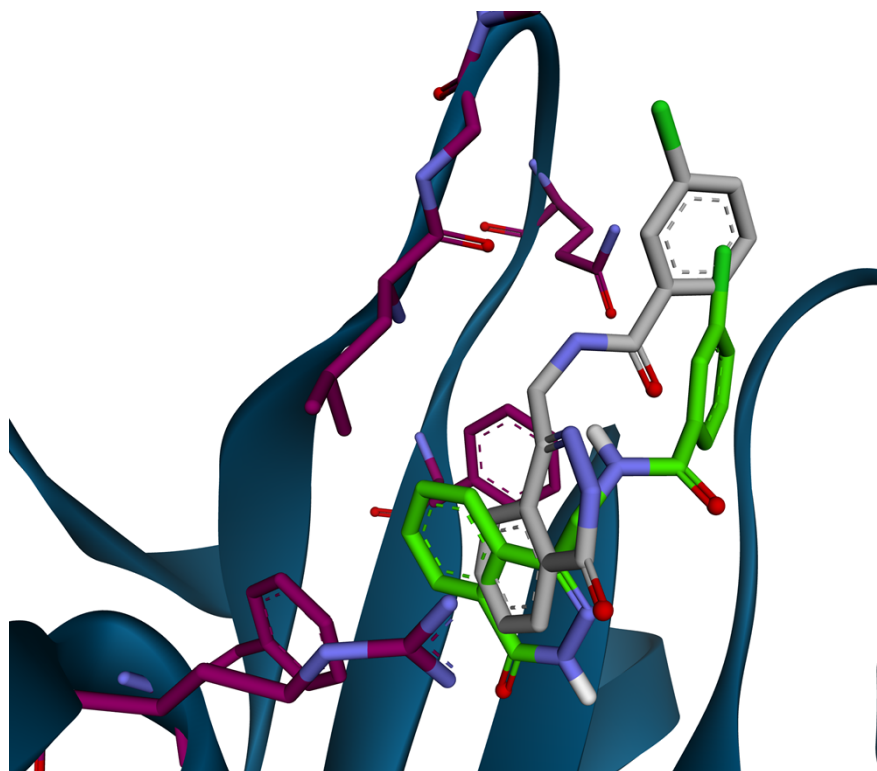

**Figure S2.** Overlay of the predicted binding pose of compound **7** following virtual screen (green) and refined dock (grey).

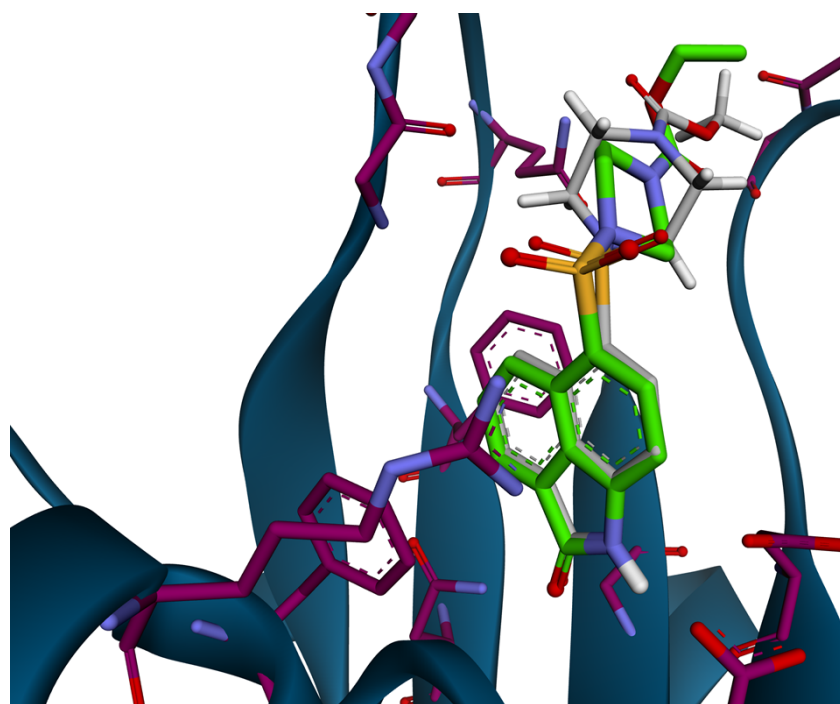

**Figure S3.** Overlay of the predicted binding pose of compound **8** following virtual screen (green) and refined dock (grey).

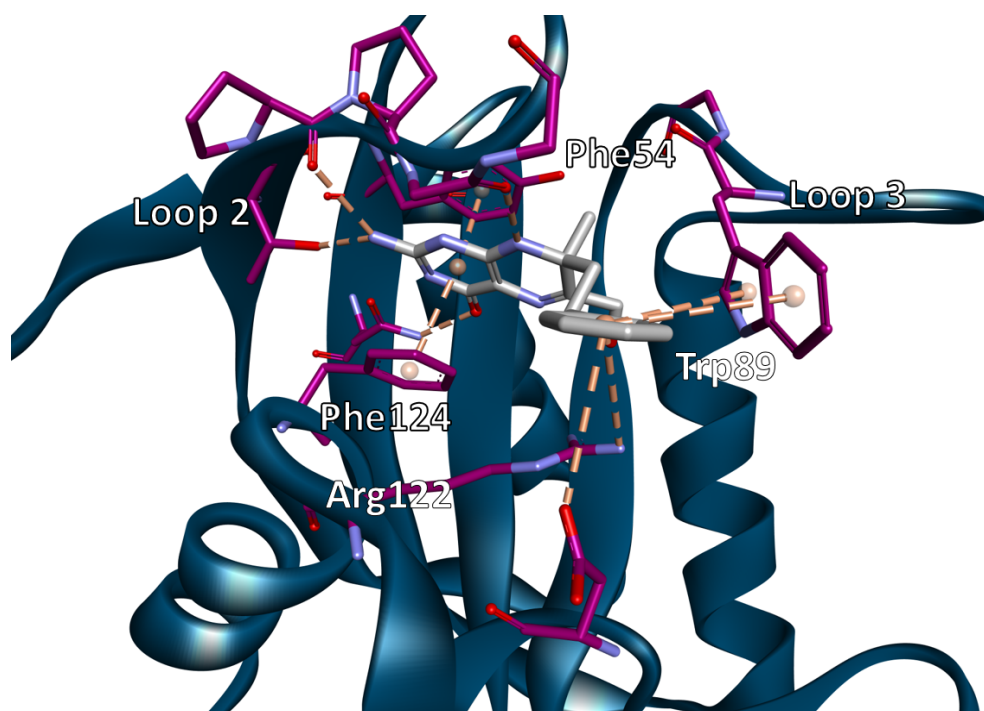

**Figure S4.** X-ray co-crystal of compound **4** bound to HPPK (PDD ID 1DY3). The phenyl ethyl arm of compound **4** forms a series of interactions, including with Arg122.

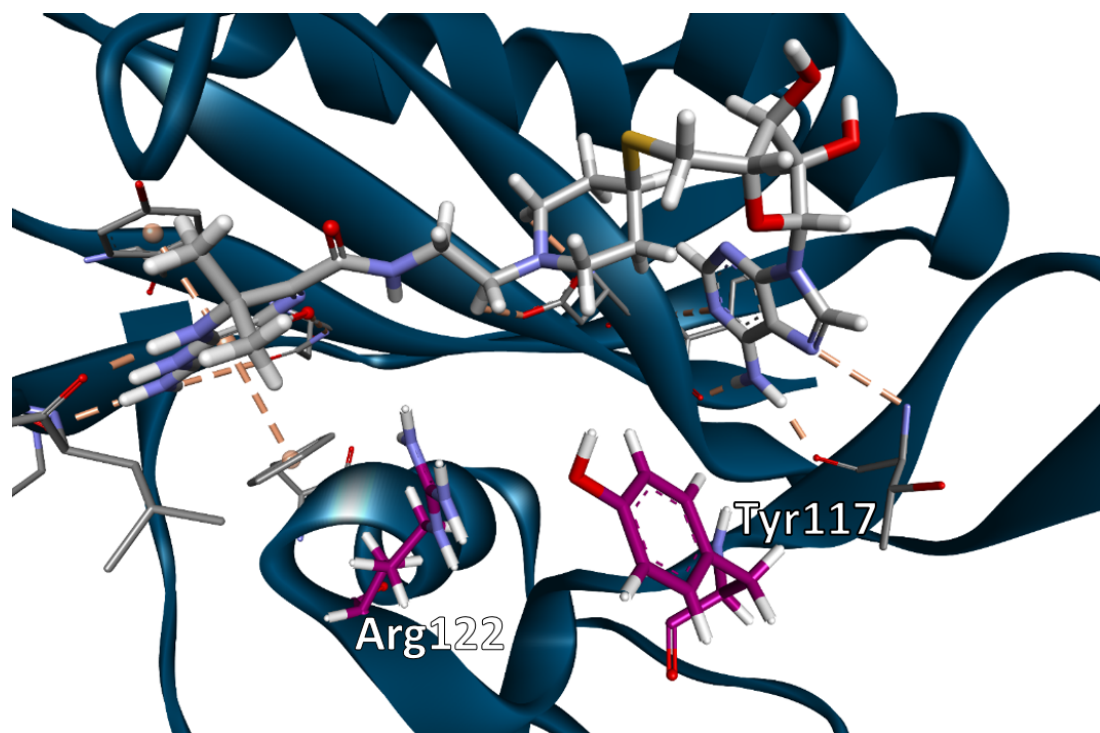

**Figure S5.** Compound **5** bound to HPPK (PDB ID 3UDV), which occupies both the HP and ATP binding regions of the catalytic cleft, but is not able to interact with Arg122, not Tyr117

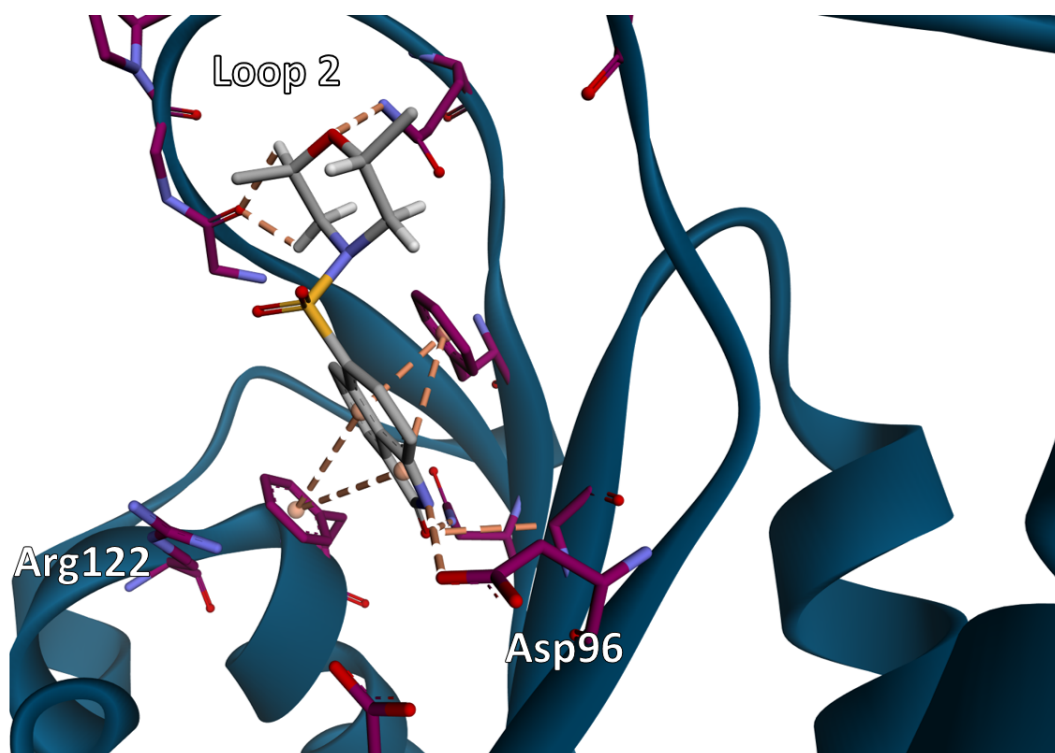

**Figure S6.** Compound **13**, whose altered conformation in the binding site precludes interaction with Arg122

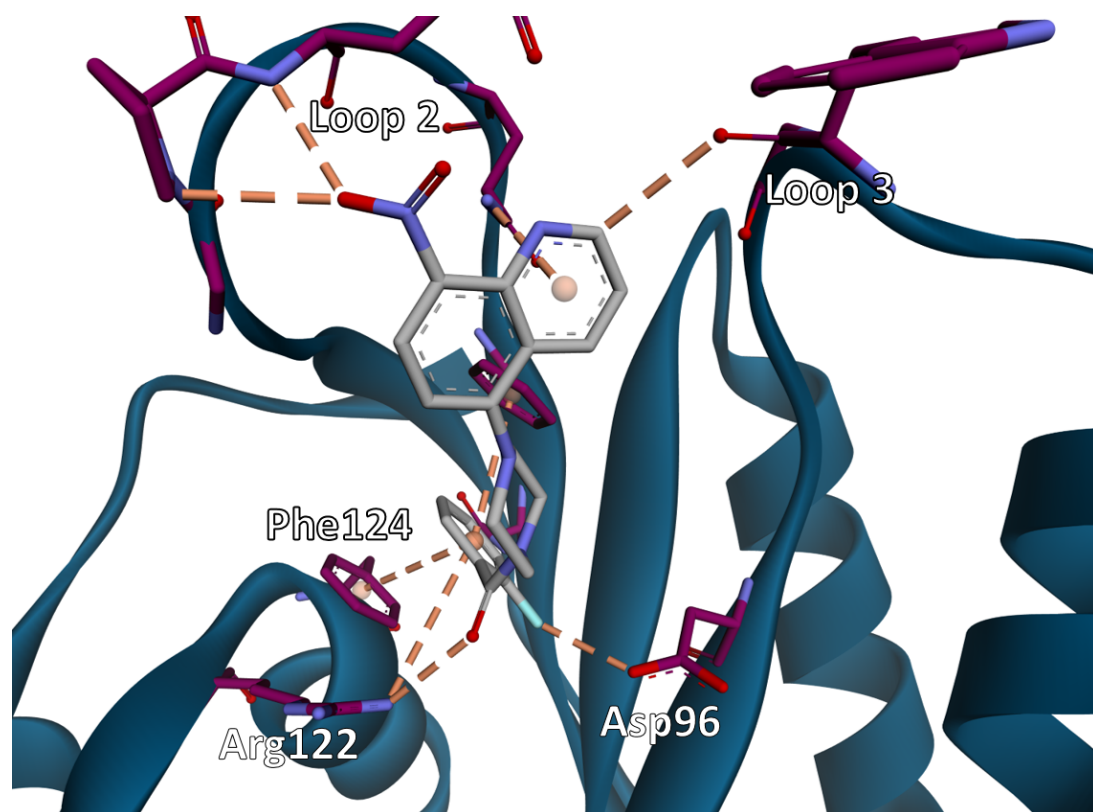

**Figure S7** Predicted binding pose of **12**, which forms interactions with residues in loops 1 and 3 as well as Arg122 and Asp96

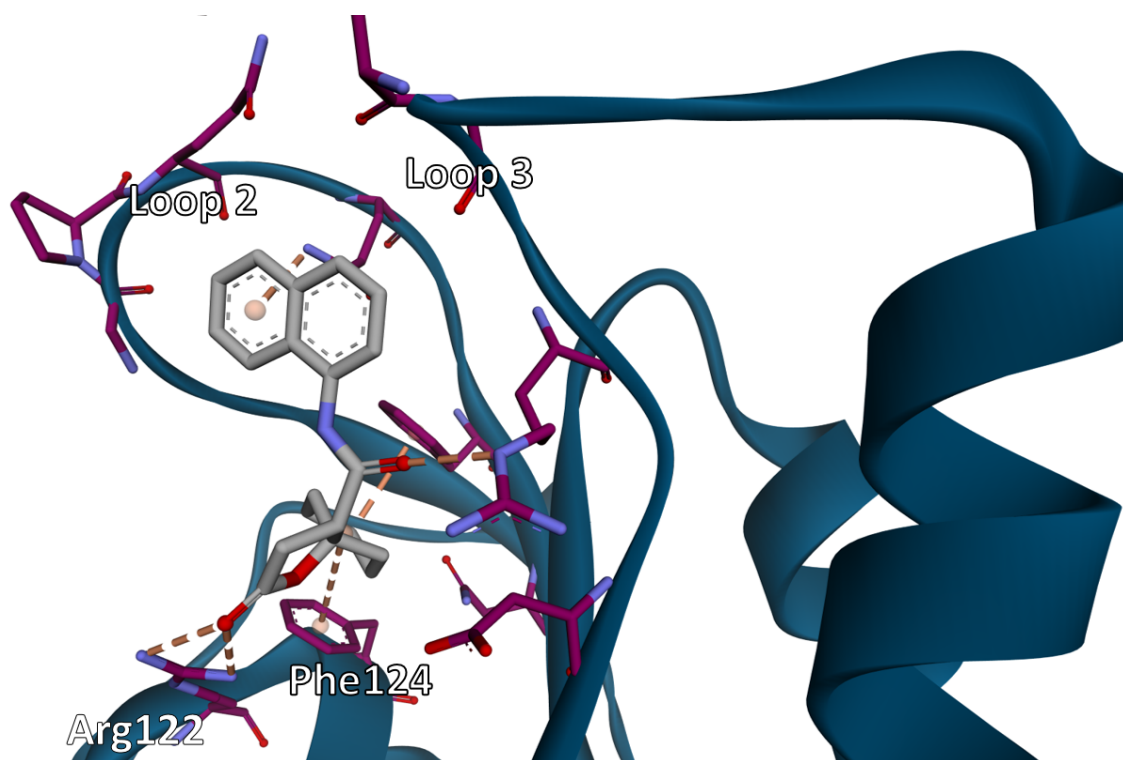

**Figure S8.** Predicted binding pose of **11**, which interacts with Arg122, but forms fewer bonds to loop 2 and 3 compared to **12**.

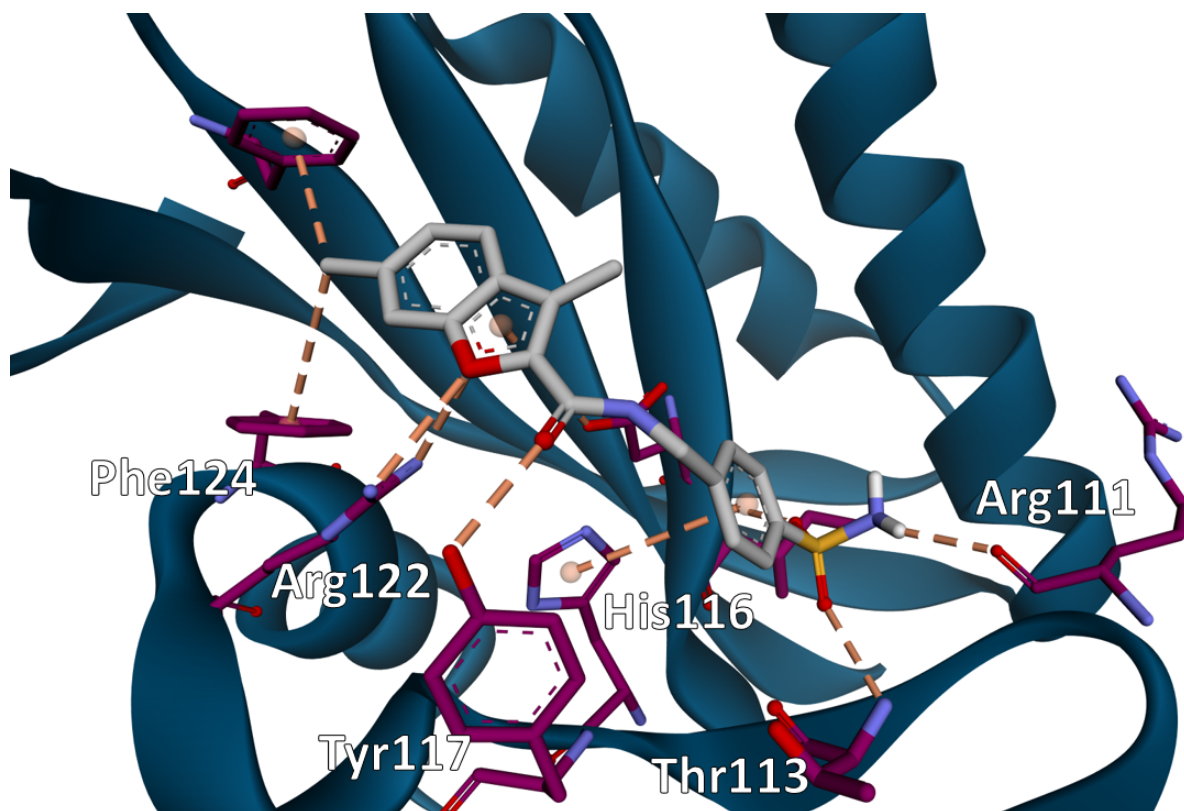

**Figure S9.** Predicted binding pose of **10**, whose binding pose orientates away from the catalytic loops, in favour of the ATP region.

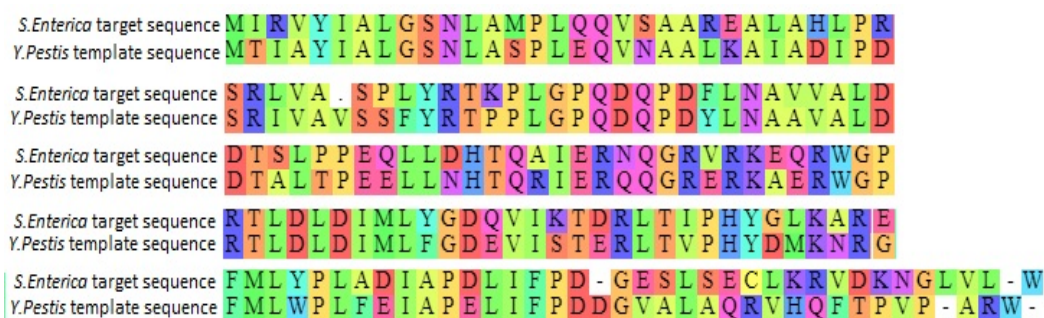

**Figure S10 *S. enterica* HPPK sequence (target) aligned against that of *Yersinia pestis* (*Y. pestis*) HPPK (template).** Gaps are represented by a (–) and modified residues are represented by a (.). Amino acids are represented by colours corresponding to Orange for small polar, green for hydrophobic, magenta for polar, red for negatively charged, and blue for positively charged amino acids.

### HPPK Luminescence assay

HPPK activity was determined by measuring unprocessed ATP using the Promega Kinase-Glo<sup>®</sup> Luminescent assay kit (Promega corporation, 2015). Stock solutions of assay components were diluted to a concentration of 10  $\mu$ M ATP, 10  $\mu$ M HMDP and 10  $\mu$ M HPPK enzyme using reaction buffer (200 mM Tris-HCl, 20 mM  $\beta$ ME, 0.02 % BSA, 20 mM MgCl<sub>2</sub>, 0.02 % Tween 20, 10 % DMSO) From these assay stock solutions, a reaction mix was made containing a final assay concentration of 0.1  $\mu$ M HPPK enzyme, 1.4  $\mu$ M HMDP and 1.5  $\mu$ M ATP in a total volume of 200  $\mu$ L. The reaction was allowed to incubate at 30 °C for 30 min, after which 200  $\mu$ l Kinase-Glo<sup>®</sup> reagent was added and the reaction proceeded for a further 10 min at room temperature before being distributed into a white flat bottomed 96 well assay plates. Luminescence was read using a SpectraMax<sup>®</sup> M3 plate reader set to read as an endpoint assay at all wavelengths with an integration time of 1 second. Inhibitors were purchased from Molport<sup>®</sup>. For inhibitor studies, inhibitor stock solutions of 10 mM were prepared in DMSO and added to the reaction mix described above to achieve a final assay concentration of 50  $\mu$ M. For the dose-response assay of compound **7**, the assay was carried out as described above, except with the inclusion of a two-fold serial dilution of the compound to achieve final compound concentrations of 100  $\mu$ M to 6.25  $\mu$ M. Luminescence readings were converted to % inhibition relative to the readings obtained with an ATP (no enzyme) control (100 % inhibition) and a reaction without inhibitor control (0 % inhibition). The IC<sub>50</sub> value was derived by non-linear regression of a plot of % inhibition vs. Log[compound] using GraphPad Prism. At the 95% confidence interval, this plot indicated an IC<sub>50</sub> range of 6.8 - 15.9  $\mu$ M .

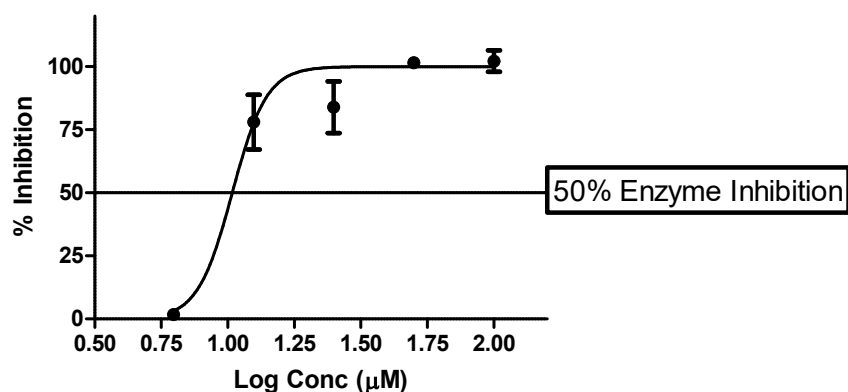

Supplement: d1md00237f1.pdf [file d1md00237f1.pdf]
